# Supplementary material for: An integrated model to evaluate the impact of social support on improving self-management of type 2 diabetes mellitus
Source: BMC Med Inform Decis Mak. 2019 Oct 22;19:197. doi: 10.1186/s12911-019-0914-9 (PMC6805520; doi:10.1186/s12911-019-0914-9)
Supplement: Supplementary file 9 — Additional file 9: It describes the specific calculation steps of the CRITIC method. [file 12911_2019_914_MOESM9_ESM.docx]

**Additional file 9.**

|  | (7) |
| --- | --- |

is the normalized value and is the original value of the variable. and represent the maximum and minimum values of the index , respectively.

|  | (8) |
| --- | --- |

where represents the amount of information contained in index and is the standard deviation of index . In addition, is the correlation coefficient between index and index and is the index number.

|  | (9) |
| --- | --- |

where is the weight of index, is the amount of information contained in index , and represents the index number.
