# Supplementary material for: An integrated model to evaluate the impact of social support on improving self-management of type 2 diabetes mellitus
Source: BMC Med Inform Decis Mak. 2019 Oct 22;19:197. doi: 10.1186/s12911-019-0914-9 (PMC6805520; doi:10.1186/s12911-019-0914-9)
Supplement: Supplementary file 10 — Additional file 10: It describes the specific calculation steps of the least squares method. [file 12911_2019_914_MOESM10_ESM.docx]

**Additional file 10.**

the object function is constructed as follows:

(10)

subject to

(11)

where denotes the normalized indicator value.

To solve the object function (10), the Lang range function is introduced and defined as follows:

Let

Alternatively, it can be represented by the following matrix Eq. (12)

|  |
| --- |

Where,

|  |  | (12) |
| --- | --- | --- |

By solving Eq. (13), the combined weight vector is calculated as the following Eq. (13)

|  |  | (13) |  |
| --- | --- | --- | --- |
